# Supplementary material
Source: PubMed Central journal article supplement (PMC2904183)
Supplement: 00151.2010_1.pdf [file 00151.2010_1.pdf]

## SUPPLEMENTARY DATA

Movie 1. Cdk2-F80G is mainly cytosolic. Three-dimensional rendering of confocal photomicroscopy localization of Cdk2-F80G. Rendering was done using Huygen software (Scientific Volume Imaging, The Netherlands). Rendering is such that structures are colored but at the same time are transparent so that any internal color can be seen. Nuclei stained with DAPI (blue), Cdk2-F80G tagged with mCherry (red).

Movie 2. Cdk2-F80GmCherry localization with Golgi. Cells were prepared as described in Fig. 5 legend. Nuclei stained with DAPI (blue), Cdk2-F80G tagged with mCherry (red). Golgi localized by anti-GM130 (green). Colocalized Cdk2-F80G and Golgi appears yellow.

Movie 3. Cdk2-F80GmCherry (red) localizes to the nucleus (stained blue with DAPI) when it is co-expressed with cyclin A. Cells were prepared as describe in Fig. 6 legend.

Movie 4. Punctate staining of cytochrome c in untreated cells. Cells stained with anti-cytochrome c (red). Nuclei stained with DAPI (blue).

Movie 5. Punctate staining of Endo G in untreated cells. Cells stained with anti-cytochrome c (red). Nuclei stained with DAPI (blue).

Movie 6. Diffuse staining of cytochrome c in cells treated with cisplatin. Cells treated with cisplatin for twenty-four hours. Cells were fixed and stained with anti-cytochrome c antibody (red). Nuclei stained with DAPI (blue).

Movie 7. Endo G is localized in cytoplasm and nucleus after cisplatin treatment. Cells treated with cisplatin for twenty-four hours and stained with anti-Endo G antibody (red).

Movie 8. Cytochrome c staining of cells expressing active mutant and treated with cisplatin. Cells treated with both Cdk2-F80G and cyclin A adenoviruses for twenty-four hours and then cisplatin for twenty-four hours. Cells stained with anti-cytochrome c (red). Nuclei stained with DAPI (blue).

Movie 9. Endo G was localized in the cytoplasm and the nucleus in cells expressing activated mutant Cdk2 after cisplatin. Cells treated with both Cdk2-F80G and cyclin A adenoviruses for twenty-four hours and then cisplatin for twenty-four hours. Cells stained with anti-Endo G (red). Nuclei stained with DAPI (blue).
